# Supplementary material for: Optimal Lot Sizes with Geometric Production Yield and Rigid Demand
Source: Atypon-hosted journal article supplement (doi:10.1287/opre.50.3.424.7743), 2002-06-01
Supplement: opre.50.3.424-sm.pdf [file opre.50.3.424-sm.pdf]

Online Companion for

“Optimal Lot Sizes with Geometric  
Production Yield and Right Demand”

Volume 50, Number 3, May-June 2002

Shoshana Anily

Leon Recanati Graduate School of Business Administration  
Tel Aviv University, Israel

Avraham Beja

Leon Recanati Graduate School of Business Administration  
Tel Aviv University, Israel

Amit Mendel

Leon Recanati Graduate School of Business Administration  
Tel Aviv University, Israel

**APPENDIX A: PROOFS OF OBSERVATIONS FOR THE GENERAL CASE**

Observation 1: For all  $D=1,2,\dots$ ,  $\max N(D) = D$ .

Furthermore, for all  $n \leq D$ ,  $U(n+1,D) - U(n,D) = C(n+1) - C(n) = \beta_{n+1}$ .

Proof: For all  $n \leq D$ ,  $V(D-n) = V(D-n-1) = 0$ , and both parts of the observation follow immediately from equation (2). •

Observation 2: For all  $D = 1,2,\dots$ ,  $V(D) > V(D-1)$ .

Proof: If  $1 \leq n \leq N(D)$  then from equation (1),  $V(D) - V(D-1) = \frac{\alpha + \beta_1}{q_1} > 0$ .

If  $n+1 \leq N(D)$  for some  $n \geq 1$ , use  $V(D) = W(n+1,D)$  and  $V(D-1) = W(n,D-1)$  to get

$$\begin{aligned} V(D) - V(D-1) &= W(n+1,D) - W(n,D-1) \\ &= \{C(n+1) + \sum_{k=1}^{n+1} P[G_{n+1}=k] V(D-k)\} / q_1 \\ &\quad - \{C(n) + \sum_{k=1}^n P[G_n=k] V(D-1-k)\} / q_1 \\ &= \frac{\beta_{n+1}}{q_1} + \frac{1}{q_1} \{ \sum_{k=1}^{n-1} [Q_k - Q_{k+1}] [V(D-k) - V(D-1-k)] \\ &\quad + [Q_n - Q_{n+1}] V(D-n) + Q_{n+1} V(D-1-n) - Q_n V(D-1-n) \} \\ &= \frac{\beta_{n+1}}{q_1} + \frac{1}{q_1} \sum_{k=1}^n [Q_k - Q_{k+1}] [V(D-k) - V(D-1-k)] \geq \frac{\beta_{n+1}}{q_1} > 0 \quad \bullet \end{aligned}$$

Observation 3:

(a) Suppose marginal costs are bounded away from zero, i.e.,  $\beta_i > 0$  for all  $i = 1,2,\dots$ , and suppose further that  $Q_i \rightarrow 0$  as  $i \rightarrow \infty$ . Then

for all  $D = 1,2,\dots$ , we have that  $\max N(D) = M$

where  $M = \max\{i = 1,2,\dots : \beta_i \geq Q_i V(1)\}$ .

(b) If, in addition, the hazard rates are bounded away from zero, i.e.,  $q_i - q_i < 1$  for all  $i = 1,2,\dots$ , then

for all  $D = 1,2,\dots$ , we have that  $\max N(D) = M$

where 
$$= \frac{\log V_1 - \log \beta}{\log(1/q)}, \quad \text{i.e., } q V(1) = .$$

Proof:

(a) First we note that for all  $D_1$  and  $D_2$ ,  $D_1 \geq 1$ ,  $D_2 \geq 1$ , we have that  $V(D_1+D_2) \geq V(D_1)+V(D_2)$ , since it is always possible to satisfy a rigid demand for  $D_1+D_2$  units by delivery of  $D_1$  units and then  $D_2$  units. In particular, we have, for all  $n$  and  $D$ ,  $V(D-n) - V(D-n-1) \geq V(1)$ , and hence from equation (2)

$$U(n+1,D) - U(n,D) = q_{n+1} - Q_{n+1}V(1)$$

For all  $n \geq M$ ,  $q_{n+1} - Q_{n+1}V(1) > 0$ , hence  $U(n+1,D) > U(n,D)$ , and the result follows.

(b) For  $n \leq M$ ,  $Q_{n+1}V(1) \leq q_{n+1} V(1) < q_{n+1}$ , hence  $U(n+1,D) > U(n,D)$ , as above. •

Observation 4: Suppose that marginal costs are non-decreasing, i.e.,  $c_i \leq c_{i+1}$  for all  $i$ .

Then for  $D = 2, 3, \dots$ ,  $\max N(D) = \min N(D-1) + 1$ .

Proof: Suppose  $m = \min N(D-1)$  and  $m+1 < n+1 \leq D$ . Then from equation (2)

$$\begin{aligned} U(n,D-1) - U(m,D-1) &= \sum_{k=m}^{n-1} [U(k+1,D-1) - U(k,D-1)] \\ &= \sum_{k=m}^{n-1} \{ q_{k+1} - Q_{k+1} [V(D-k-1)-V(D-k-2)] \} \geq 0 \end{aligned}$$

where the non-negativity derives from  $m \leq N(D-1)$ . Similarly,

$$\begin{aligned} U(n+1,D) - U(m+1,D) &= \sum_{k=m+1}^n \{ q_{k+1} - Q_{k+1} [V(D-k)-V(D-k-1)] \} \\ &= \sum_{k=m}^{n-1} \{ q_{k+2} - Q_{k+2} [V(D-k-1)-V(D-k-2)] \}. \end{aligned}$$

Now  $q_{k+2} \geq q_{k+1}$ ,  $Q_{k+2} < Q_{k+1}$ , and  $V(D-k-1)-V(D-k-2) > 0$  for all  $k \leq n-1 \leq D-2$ , together with  $n > m$ , imply  $U(n+1,D) - U(m+1,D) > 0$ , hence  $n+1 \leq N(D)$ , and the observation follows. •

Observation 5: Suppose that marginal costs are non-decreasing, i.e.,  $c_i \leq c_{i+1}$  for all  $i$ .

Then (i)  $D \leq N(D)$  implies  $N(d) = \{d\}$  for  $d = 1, \dots, D-1$ ; and

(ii)  $D \leq N(D)$  implies  $d \leq N(d)$  for  $d = D+1, D+2, \dots$

Proof In view of Observation 1 and Observation 4, we have

(i)  $D \leq N(D) \implies \max N(D)=D = \min N(D-1) = \max N(D)-1=D-1 \implies N(D-1)=\{D-1\}$

etc.

(ii)  $D \quad N(D) \quad \min N(D) \quad D - 1 \quad \max N(D+1) \quad D \quad D+1 \quad N(D+1) \quad \text{etc.} \quad \bullet$

## APPENDIX B: PROOF OF LEMMA 3.2

Lemma 3.2: Suppose that hazard rates are constant, i.e.,  $q_i = q$  for all  $i$ , and that costs are such that  $\exists$  exists. Then,

(a) for  $D = 1, 2, \dots$ , and  $n = 1, \dots, D$ ,

$$|S(n, D)| \leq [V(1) - \varphi] Q^D$$

(b)  $V(D+1) - V(D) \rightarrow 0$  as  $D \rightarrow \infty$ .

### Proof of Lemma 3.2

Part (a):

First recall equation (5):

$$U(n, D) = V(D) + [f(n) - \varphi] \sum_{k=1}^n q^k - S(n, D) \quad (5)$$

This equation implies the following relationships:

(i) For all  $n$ ,  $U(n, D) \geq V(D)$  implying  $S(n, D) \leq [f(n) - \varphi] \sum_{k=1}^n q^k$ .

For  $r \leq N(D)$ ,  $U(r, D) = V(D)$  implying  $S(r, D) = [f(r) - \varphi] \sum_{k=1}^r q^k$ .

(ii) For all  $n$ ,  $[f(n) - \varphi] \geq 0$ ; (by definition of  $\varphi$ )

For  $m \leq N_0$ ,  $[f(m) - \varphi] = 0$ ; (by definition of  $N_0$ )

Hence:

For  $r \leq N(D)$ ,  $S(r, D) \geq 0$

For  $m \leq N_0$ ,  $S(m, D) = 0$ .

The statement in part (a) of the lemma holds for  $n = D = 1$ . We assume inductively that it holds for  $d = 1, \dots, D-1$ , and  $n = 1, \dots, d$ , and prove that it holds for  $D$  and  $n = 1, \dots, D$ .

For convenience, define also  $S(n, D) = 0$  if  $n = 0$  or  $D = 0$ . From the definition of  $S$ , we have for  $i = 1, \dots, j$ :

$$S(j, D) = S(i, D) + q^i S(j-i, D-i)$$

In what follows, let  $r \in \mathbb{N}(D)$ ,  $m \in \mathbb{N}_0$  and  $n \in \{1, \dots, D\}$ . To avoid messier notation, we consider separately each of the following four cases.

(i)  $n = \min\{m, r\}$ :

$$S(r, D) = S(n, D) + q^n S(r-n, D-n) \quad 0$$

$$S(n, D) - q^n S(r-n, D-n) - q^n [V(1) - ] q^{D-n} = - [V(1) - ] q^D$$

$$S(m, D) = S(n, D) + q^n S(m-n, D-n) \quad 0$$

$$S(n, D) - q^n S(m-n, D-n) - q^n [V(1) - ] q^{D-n} = [V(1) - ] q^D$$

$$\text{Thus, } |S(n, D)| \leq [V(1) - ] q^D$$

(ii)  $n = \max\{m, r\}$ :

$$S(r, D) = S(n, D) - q^r S(n-r, D-r) \quad 0$$

$$S(n, D) - q^r S(n-r, D-r) - q^r [V(1) - ] q^{D-r} = - [V(1) - ] q^D$$

$$S(m, D) = S(n, D) - q^m S(n-m, D-m) \quad 0$$

$$S(n, D) - q^m S(n-m, D-m) - q^m [V(1) - ] q^{D-m} = [V(1) - ] q^D$$

Similarly for,

(iii)  $m \leq n \leq r$ :

$$S(r, D) = S(n, D) + q^n S(r-n, D-n) \quad 0 \quad \text{exactly as in (i)}$$

$$S(m, D) = S(n, D) - q^m S(n-m, D-m) \quad 0 \quad \text{as in (ii)}$$

(iv)  $r \leq n \leq m$ :

$$S(r, D) = S(n, D) - q^r S(n-r, D-r) \quad 0 \quad \text{as in (ii)}$$

$$S(m, D) = S(n, D) + q^n S(m-n, D-n) \quad 0 \quad \text{as in (i)}$$

In all four cases,  $|S(n, D)| \leq [V(1) - ] q^D$ , proving the lemma by induction.

Part (b):

Follows immediately from part (a), as  $V(D+1) - V(D) - = S(1, D+1)/q \quad 0$ .

## APPENDIX C: PROOFS OF SOME RESULTS FOR THE STANDARD CASE

We start with a technical observation and a lemma.

Observation C-1 
$$\sum_{j=i}^k j q^j = \frac{iq^i}{1-q} + q^{i+1} \frac{1-q^{k-i}}{(1-q)^2} - \frac{kq^{k+1}}{1-q}$$

To verify this, define  $S = \sum_{j=i}^k j q^j = i q^i + (i+1) q^{i+1} + \dots + k q^k$   
 and thus,  $qS = \sum_{j=i}^k j q^{j+1} = i q^{i+1} + \dots + (k-1) q^k + k q^{k+1}$   
 $(1-q)S = i q^i + [q^{i+1} + q^{i+2} + \dots + q^k] - k q^{k+1}$

Dividing by  $(1-q)$ , and summing the geometric-series, gives the stated observation.

The following lemma is used in the proof of Theorem 2.

Define  $A = \frac{1-q}{q} \alpha + 1$ , and  $B = \frac{1-q}{q}$ .

Lemma C.1

If  $n-1 \in N(d-1)$  and  $n \in N(d)$ ,  
 then  $V(d) - V(d-1) = A + Bn$ .

Proof

According to equation (1), under the postulated conditions

$$V(d-1) = U(n-1, d-1) = V(d-1) + \sum_{k=1}^{n-1} q^k [V(d-k) - V(d-1-k)]$$

hence  $\sum_{k=1}^{n-1} q^k [V(d-k) - V(d-1-k)] = 0$  (C.1)

Similarly,

$$V(d) = U(n, d) = V(d) + \sum_{k=1}^n q^k [V(d+1-k) - V(d-k)]$$

$$\sum_{k=1}^n q^k [V(d+1-k) - V(d-k)] = 0$$
 (C.2)

Subtracting (C.1) from (C.2), we get

$$\begin{aligned} 1 &= q[V(d) - V(d-1)] + \sum_{k=2}^n q^k [V(d+1-k) - V(d-k)] - \sum_{k=1}^{n-1} q^k [V(d-k) - V(d-1-k)] \\ &= q[V(d) - V(d-1)] + \sum_{k=1}^{n-1} q^{k+1} [V(d-k) - V(d-1-k)] - \sum_{k=1}^{n-1} q^k [V(d-k) - V(d-1-k)] \end{aligned}$$

implying

$$V(d) - V(d-1) = \frac{1}{q} + \frac{1-q}{q} \sum_{k=1}^{n-1} q^k [V(d-k) - V(d-1-k)]$$

and using (C.1) once more, we finally get

$$V(d) - V(d-1) = \frac{1}{q} + \frac{1-q}{q} (\alpha + n - 1) = A + Bn.$$

To state and prove Theorem 2, recall the following definitions from Sections 2 and 4.

$$= \frac{\ln \frac{1+\alpha}{q}}{\ln \frac{1}{q}}, \quad \text{i.e., } q^{\frac{1+\alpha}{q}} = 1$$

$$= \frac{-\alpha + \sqrt{\alpha^2 + 4\alpha / \ln(1/q)}}{2}, \quad \text{i.e., } (\dots) \ln(1/q) =$$

$$= \max \{n = 0, 1, 2, \dots : n \dots\}$$

$$= \dots \text{ if } q^{\frac{\xi}{\xi+1} (\alpha + \xi + 1)} \dots$$

$$= \dots + 1 \text{ otherwise } (\dots \text{ is a strictly positive integer})$$

$$L_1 = \dots \text{ if } \dots = 1$$

$$= \dots + \frac{\log \frac{\alpha + \kappa}{\kappa}}{\log \frac{1}{q}} \text{ if } 1 < \dots \frac{q}{1-q} \alpha$$

$$= \frac{q}{1-q} \alpha + 1 \text{ if } \dots > \frac{q}{1-q} \alpha \text{ and } \dots > 1$$

$$L = L_1$$

Theorem 2

For  $D = 1, 2, \dots, D \in \mathbb{N}(D)$  if and only if  $D \leq L$ .

Proof of Theorem 2

Note that  $q > 1$ . We first analyze the case  $q < 2$ : By Observation 3,  $\max N(D) = L$  for all  $D$ , implying  $N(D) = \{1\}$  for all  $D$ , and thus  $D \in \mathbb{N}(D)$  if and only if  $D = 1$ . Therefore, for this case it remains to show that  $L=1$  or equivalently, that  $1 < L_1 < 2$ . Rewriting the expression for  $L_1$ , we get that  $q^{-1}(1 + \alpha) = 1$ . Combining this equality with  $1 < q < 2$  we obtain that  $q(\alpha + 1) < 1$ , i.e.,  $\alpha < \frac{1}{q} - 1$ , i.e.,  $\frac{q}{1-q}\alpha < 1$ . Hence, by definition of  $L_1$ ,  $L_1$  can either be equal to  $\alpha$  or  $L_1 = \frac{q}{1-q}\alpha + 1$ , and in both cases we get  $1 < L_1 < 2$  which implies  $L = 1$ .

For  $q \geq 2$ , the theorem is proved by induction.  $1 \in \mathbb{N}(1)$  and  $1 < L_1$  hold trivially. Assuming inductively that  $d \in \mathbb{N}(d)$  for  $d = 1, \dots, D$ , we now show that  $D+1 \in \mathbb{N}(D+1)$  if and only if  $D+1 \leq L$ . (To complete the proof, we will show later that for all  $D > L$ ,  $D \notin \mathbb{N}(D)$ .)

Clearly,

$$D+1 \in \mathbb{N}(D+1) \iff U(D+1, D+1) \iff U(m, D+1) \text{ for } m = 1, \dots, D.$$

Thus, we will show that  $U(D+1, D+1) \iff U(m, D+1)$  for  $m = 1, \dots, D$  if and only if  $D+1 \leq L$ . We partition the proof of this statement into three steps: In the first step of the proof we will show that the condition  $U(D+1, D+1) \iff U(m, D+1)$  for  $m = 1, \dots, D$  is equivalent to the following condition:  $q^{D+1} \max_{x=1, \dots, D} y(x)$  where  $y(x) = \frac{xq^x}{\alpha + x}$ . As a result we prove in the next two steps that  $q^{D+1} \max_{x=1, \dots, D} y(x)$  if and only if  $D+1 \leq L$ . In the second step we will show that the function  $y(x)$  is unimodal on  $x \geq 0$  and it is maximized at  $x = \lfloor L \rfloor$ . In addition, we will show that  $\lfloor L \rfloor$ , which is equal to either  $L$  or to  $L + 1$ , maximizes  $y(x)$  on  $x=1, 2, \dots$ . Therefore,

$$\begin{aligned} \max_{x=1, \dots, D} y(x) &= y(D) \quad \text{if } D \leq L \\ &= y(\lfloor L \rfloor) \quad \text{if } D > L \end{aligned}$$

In the third step we will prove the desired result, i.e.,  $q^{D+1} \max_{x=1, \dots, D} y(x)$  if and only if  $D+1 \leq L$ .

We start with the first step of the proof and note that

$$\begin{aligned} U(D+1, D+1) - U(m, D+1) &= \sum_{j=m}^D [U(j+1, D+1) - U(j, D+1)] \\ &= \sum_{j=m}^D \{1 - q^{j+1} [V(D+1-j) - V(D-j)]\}. \end{aligned}$$

For  $j = 1, \dots, D-1$ ,  $2 \leq D+1-j \leq D$ , hence by the induction assumption both  $D-j \leq N(D-j)$  and  $D+1-j \leq N(D+1-j)$  hold, and we use Lemma C.1 to get

$$U(D+1, D+1) - U(m, D+1) = D-m+1 - \sum_{j=m}^{D-1} q^{j+1} [A+B(D+1-j)] - q^{D+1} \frac{\alpha + 1}{q}$$

where  $A = \frac{1-q}{q} \alpha + 1$  and  $B = \frac{1-q}{q}$ . Thus,

$$U(D+1, D+1) - U(m, D+1) = D-m+1 - [A+B(D+1)] \sum_{j=m}^{D-1} q^{j+1} + B \sum_{j=m}^{D-1} j q^{j+1} - q^{D+1} (\alpha + 1)$$

Observe that,  $\sum_{j=m}^{D-1} j q^{j+1} = q^{m+1} \frac{1 - q^{D-m}}{1 - q}$

and from Observation C-1

$$\sum_{j=m}^{D-1} j q^{j+1} = \frac{mq^{m+1}}{1-q} + q^{m+2} \frac{1 - q^{D-m-1}}{(1-q)^2} - \frac{(D-1)q^{D+1}}{1-q}.$$

Thus,

$$\begin{aligned} U(D+1, D+1) - U(m, D+1) &= D-m+1 - \left\{ \frac{1-q}{q} \alpha + 1 + \frac{1-q}{q} (D+1) \right\} q^{m+1} \frac{1 - q^{D-m}}{1 - q} \\ &\quad + \frac{1-q}{q} \left\{ \frac{mq^{m+1}}{1-q} + q^{m+2} \frac{1 - q^{D-m-1}}{(1-q)^2} - \frac{(D-1)q^{D+1}}{1-q} \right\} - q^{D+1} (\alpha + 1) \end{aligned}$$

$$U(D+1, D+1) - U(m, D+1) = D - m + 1 - q^m [1 - q^{D-m}] - q^{m+1} \frac{1 - q^{D-m}}{1 - q}$$

$$\begin{aligned}
& - Dq^m [1-q^{D-m}] - q^m [1-q^{D-m}] + mq^m + q^{m+1} \frac{1-q^{D-m-1}}{1-q} - (D-1)q^D - q^D (\dots) \\
& = D-m+1 - q^m + q^D - \frac{q^{m+1}}{1-q} + \frac{q^{D+1}}{1-q} - Dq^m + Dq^D - q^m + q^D + mq^m + \frac{q^{m+1}}{1-q} \\
& - \frac{q^D}{1-q} - Dq^D + q^D - q^D - q^D \\
& = D - m + 1 - q^m - q^D - Dq^m - q^m + q^D + mq^m
\end{aligned}$$

This reduces to:

$$U(D+1, D+1) - U(m, D+1) = D-m+1 - q^m - (D-m+1) q^m$$

Therefore,  $U(D+1, D+1) \geq U(m, D+1)$  for  $m = 1, \dots, D$

is equivalent to

$$D - m + 1 \geq q^m + (D-m+1) q^m \text{ for } m = 1, \dots, D.$$

By setting  $k = D-m+1$  (so that  $m = D-k+1$ ) we can rewrite the above condition as

$$k \geq (k+1) q^{D+1-k} \text{ for } k = 1, \dots, D, \text{ or equivalently, that :}$$

$$q^{D+1} \geq \frac{kq^k}{\alpha + k} \text{ for } k = 1, \dots, D. \text{ By defining } y(x) \text{ as } \frac{xq^x}{\alpha + x}, \text{ we get that the}$$

condition  $U(D+1, D+1) \geq U(m, +1)$  for  $m = 1, \dots, D$  is equivalent to  $q^{D+1} \geq \max_{x=1, \dots, D} y(x)$

$y(x)$ , which completes the first step of the proof. As a result we conclude that it is

sufficient to show that  $q^{D+1} \geq \max_{x=1, \dots, D} y(x)$  if and only if  $D+1 \geq L$ .

For the second step of the proof we consider the derivative of  $y(x)$ :

$$\begin{aligned}
y'(x) &= \frac{1}{(\alpha + x)^2} \{ [q^x + x \ln(q) q^x] (\alpha + x) - xq^x \} = \frac{q^x}{(\alpha + x)^2} \{ [1 + x \ln q] (\alpha + x) - x \} \\
&= \frac{q^x}{(\alpha + x)^2} \{ -x (\alpha + x) \ln \left( \frac{1}{q} \right) \}
\end{aligned}$$

$y$  is unimodal on  $x \geq 0$  since:

$$\begin{aligned}
y'(x) &> 0 && \text{if } x(\alpha + x) \ln\left(\frac{1}{q}\right) < \\
&= 0 && \text{if } x(\alpha + x) \ln\left(\frac{1}{q}\right) = 0 \\
&< 0 && \text{if } x(\alpha + x) \ln\left(\frac{1}{q}\right) > 0.
\end{aligned}$$

Hence  $x = 0$ , as defined above, maximizes  $y(x)$  on  $x \in [0, \alpha]$ , and  $x = \alpha$ , as defined above, maximizes  $y(x)$  on  $x = 1, 2, \dots$ . This completes the second step in the proof.

In the third step of the proof we show that  $q^{D+1} \geq \max_{x=1, \dots, D} y(x)$  if and only if  $D+1 \leq L$ .

We note that since  $D$  is integer,  $D \leq L$  if and only if  $D \leq L_1$ . Consider the three cases in the definition of  $L_1$ :

(i) Suppose  $\alpha = 1$ .

Then  $x = 1$  maximizes  $y(x)$  on  $x = 1, \dots, D$  and the condition  $q^{D+1} \geq \max_{x=1, \dots, D} y(x)$  becomes  $q^{D+1} \geq \frac{q}{\alpha + 1}$ , or equivalently  $q^D (\alpha + 1) \geq 1$ . In view of the fact that  $q^{-1}(\alpha + 1) = 1$  (see definition of  $L_1$ ) we get that  $q^D (\alpha + 1) \geq 1$  if and only if  $D \leq -1$  and thus  $q^{D+1} \geq \max_{x=1, \dots, D} y(x)$  is satisfied if and only if  $D+1 \leq L_1$ , i.e., if and only if  $D+1 \leq L$ .

(ii) Suppose  $1 < \frac{q}{1-q}$ .

If  $D+1 \leq L_1 = \frac{\log \frac{\alpha + \kappa}{\kappa}}{\log \frac{1}{q}}$ , then  $\left(\frac{1}{q}\right)^{D+1} \geq \left(\frac{1}{q}\right)^\kappa \frac{\alpha + \kappa}{\kappa}$ . Hence,

$q^{D+1} \frac{\kappa q^\kappa}{\alpha + \kappa} = y(\alpha) = \max_{x=1, 2, \dots} y(x) = \max_{x=1, \dots, D} y(x)$ , and the condition

$q^{D+1} \geq \max_{x=1, \dots, D} y(x)$  is satisfied, so that  $D+1 \leq (D+1)$ .

On the other hand, if  $D+1 > L_1$ , then by an identical argument  $q^{D+1} < y(\cdot)$ . Note that,

$$\frac{q}{1-q} - q = q \left( \frac{1}{q} - 1 \right) = \frac{1}{q} \frac{\alpha + \kappa}{\kappa} \frac{\log \frac{\alpha + \kappa}{\kappa}}{\log \frac{1}{q}} - 1.$$

Hence, if  $D+1 > L_1$ , then  $D > \cdot$  (see definition of  $L_1$ ), so that  $y(\cdot) = \max_{x=1, \dots, D} y(x)$ . Thus,  $q^{D+1} < \max_{x=1, \dots, D} y(x)$ , and therefore  $D+1 \notin N(D+1)$ .

(iii) Suppose  $\cdot > \frac{q}{1-q}$ , and  $\cdot > 1$ .

If  $D+1 \leq L_1 = \frac{q}{1-q} + 1$  then  $D < \cdot$ , and by the unimodality of  $y(x)$ , the value  $x = D$

maximizes  $y(x)$  on  $x = 1, \dots, D$ , so that the condition  $q^{D+1} \leq \max_{x=1, \dots, D} y(x)$  becomes  $q^{D+1} \leq \frac{Dq^D}{\alpha + D}$ , which is equivalently to  $q(\cdot + D) \leq D$ , or alternatively,  $D \leq \frac{q}{1-q}$ . Thus,

$D+1 \leq L_1$  implies that  $q^{D+1} \leq \max_{x=1, \dots, D} y(x)$  and therefore  $D+1 \in N(D+1)$ . On the other hand, if  $D+1 > \frac{q}{1-q} + 1$  then  $D - qD > q$ , i.e.,  $q < \frac{D}{\alpha + D}$ , hence  $q^{D+1} < \frac{Dq^D}{\alpha + D} = y(D)$ ,

and clearly  $y(D) = \max_{x=1, \dots, D} y(x)$ , so that the condition  $q^{D+1} \leq \max_{x=1, \dots, D} y(x)$  is not satisfied and  $D+1 \notin N(D+1)$ .

The above proves by induction that  $D \in N(D)$  whenever  $D \leq L$ , and that  $L+1 \in N(L+1)$ , i.e.,  $\max N(L+1) < L+1$ . It remains to show that  $\max N(D) < D$  also for all  $D > L$ . This follows from Observation 4, which implies that  $\max N(D) = \max N(L+1) + D - (L+1) < D$ .

Next we present Lemma C.2, which is used in the proof of Theorem 3 below.

### Lemma C.2

For all  $D = 1, 2, \dots$ ,  $V(D+1) - V(D) < A + B(L+1)$

### Proof

We first show that  $V(L+1) - V(L) < A + B(L+1)$ .

By Theorem 2,  $L+1 \in N(L+1)$ , hence from equation (1)

$$V(L+1) < U(L+1, L+1) = V(L+1) + \cdot + L + 1 - \sum_{k=1}^{L-1} q^k [V(L+2-k) - V(L-1-k)]$$

implying

$V(L+1) - V(L) < \frac{\alpha + L + 1}{q} - \sum_{k=1}^{L-1} q^k [V(L+1-k) - V(L-k)] - q^L \frac{\alpha + 1}{q}$ . Note that when

$k = 1, \dots, L-1$ , then  $2 \leq L+1-k \leq L$ , hence by Theorem 2,  $V(L+1-k) \leq N(L+1-k)$ , thus by Lemma C.1,

$V(L+1-k) - V(L-k) = A + B(L+1-k)$ . Therefore,

$$V(L+1) - V(L) < \frac{\alpha + L + 1}{q} - \sum_{k=1}^{L-1} q^k [A + B(L+1-k)] - q^L \frac{\alpha + 1}{q}$$

$$V(L+1) - V(L) < \frac{\alpha + L + 1}{q} - [A + B(L+1)] \sum_{k=1}^{L-1} q^k + B \sum_{k=1}^{L-1} k q^k - q^L \frac{\alpha + 1}{q}.$$

In order to evaluate the right hand side of the above equation, we value the geometric-series summation in the second term, use Observation (C-1) to value the third term, and use the definitions of A and B, to get (details omitted)

$$\frac{\alpha + L + 1}{q} - [A + B(L+1)] \sum_{k=1}^{L-1} q^k + B \sum_{k=1}^{L-1} k q^k - q^L \frac{\alpha + 1}{q} = A + B(L+1)$$

and thus,

$$V(L+1) - V(L) < A + B(L+1).$$

For  $D = 1, \dots, L-1$ , we have from Lemma C.1

$$V(D+1) - V(D) = A + B(D+1) \leq A + BL < A + B(L+1).$$

It remains to show that  $V(D+1) - V(D) < A + B(L+1)$  for  $D = L+1, L+2, \dots$ . We prove this by induction: assuming that  $[V(d+1) - V(d) < A + B(L+1)$  for  $d = 1, \dots, D-1]$  holds for some  $D$  where  $D-1 \geq L$  (which we know holds for  $D = L+1$ ), we show that

$$V(D+1) - V(D) < A + B(L+1).$$

Let  $n \in \mathbb{N}(D)$ . Since  $D \geq L+1$ , it follows from Theorem 2 that  $n < D$ . Using equation (1),

$$V(D+1) - U(n, D+1) = V(D+1) + \sum_{k=1}^n q^k [V(D+2-k) - V(D+1-k)]$$

$$- \sum_{k=1}^n q^k [V(D+1-k) - V(D-k)] - \sum_{k=2}^n q^k [V(D+2-k) - V(D+1-k)]$$

$$V(D+1) - V(D) = \frac{\alpha + n}{q} - \frac{1}{q} \sum_{j=1}^{n-1} q^{j+1} [V(D+1-j) - V(D-j)]$$

In order to evaluate  $\sum_{j=1}^{n-1} q^{j+1}$  in the above expression, we use equation (1) again for  $U(n, D)$ , recalling  $n \in \mathbb{N}(D)$

$$V(D) = U(n,D) = \sum_{k=1}^n q^k [V(D+1-k) - V(D-k)]$$

$$+ n = \sum_{k=1}^n q^k [V(D+1-k) - V(D-k)]$$

hence,

$$V(D+1) - V(D) = \frac{1}{q} \sum_{k=1}^n q^k [V(D+1-k) - V(D-k)] - \frac{1}{q} \sum_{j=1}^{n-1} q^{j+1} [V(D+1-j) - V(D-j)]$$

$$V(D+1) - V(D) = \frac{1-q}{q} \sum_{j=1}^{n-1} q^j [V(D+1-j) - V(D-j)] + q^n [V(D+1-n) - V(D-n)].$$

Since  $n < D$  it follows from the induction assumption that  $[V(D+1-j) - V(D-j)] < A + B(L+1)$

for  $j = 1, \dots, n$ . Thus,

$$V(D+1) - V(D) < \left\{ \frac{1-q}{q} \sum_{j=1}^{n-1} q^{j+1} + q^n \right\} \{A + B(L+1)\} = \left\{ \frac{1-q}{q} \frac{q - q^n}{1-q} + q^n \right\} < A + B(L+1)$$

which completes the proof.

We conclude this appendix with the proof of Theorem 3.

Theorem 3  $\max \{k \in \mathbb{N}(D) : D = 1, 2, \dots\} = L$

Proof

From Theorem 2 we have  $L \in \mathbb{N}(L)$ , hence  $\max \{k \in \mathbb{N}(D) : D = 1, 2, \dots\} = L$ . Assume by contradiction that  $\max \{k \in \mathbb{N}(D) : D = 1, 2, \dots\} > L$ . In view of Observation 4 (which states that a unit increase in the outstanding demand can induce no more than a unit increase in the optimal lot size) there exists  $d$  such that  $L \in \mathbb{N}(d)$  and  $L+1 \in \mathbb{N}(d+1)$ . Then from Lemma C.1  $V(d+1) - V(d) = A + B(L+1)$ , while from Lemma C.2,  $V(d+1) - V(d) < A + B(L+1)$  which is a contradiction, forcing the conclusion that  $\max \{k \in \mathbb{N}(D) : D = 1, 2, \dots\} = L$ , as stated.
